# Supplementary material for: Lsh regulates LTR retrotransposon repression independently of Dnmt3b function
Source: PubMed Central journal article supplement (PMC4054100; doi:10.1186/gb-2013-14-12-r146), 2013-12-24
Supplement: gb-2013-14-12-r146-S1.pdf [file gb-2013-14-12-r146-S1.pdf]

## Additional\_file\_1 as PDF: Legends

**Figure S1.** No changes in methyltransferase levels in the absence of Lsh and hypomethylation of Lsh nuclei. **a)** Left panel: indirect immunofluorescence on fixed cells using a 5-methylcytosine (left) antibody and a single-stranded DNA (right) antibody. 5meC staining was detected with an Alexa Fluor 594 secondary antibody yielding a red stain and single-stranded DNA with an Alexa Fluor 488 secondary yielding a green stain. Note the absence of multiple condensed heterochromatic foci in *Lsh*<sup>-/-</sup> nuclei compared to wildtype nuclei indicated by white dashed circles. Right panel: indirect immunofluorescence on fixed cells using an Lsh antibody (left) and DAPI stained DNA (right). Lsh staining was detected with an Alexa Fluor 488 secondary antibody yielding a green stain. Note the absence of Lsh nuclear staining in *Lsh*<sup>-/-</sup> cells compared to wildtype cells. Scale bar = 10μM. **b)** Wild type and *Lsh*<sup>-/-</sup> genomic DNA was mock-digested and digested with Msp I, Hpa II and MaeII, which reveals normal methylation digestion profiles in wild type cells. In *Lsh*<sup>-/-</sup> cells note the small digestion fragments (black arrowheads) with Mae II digestion; indicative of hypomethylation. The Mae II digest were also run side by side for direct comparison. **c)** Graph indicating no differences in transcript levels (microarray) for DNA methyltransferases in wild type and *Lsh*<sup>-/-</sup> fibroblasts.

**Figure S2.** HELP-seq Additional file. **a)** Example of HELP-seq data in Dnmt3b knockout system. Left: a HELP-seq browser track showing mouse chr2:95100568-951000802 (genomic build mm9) and loss of methylation at the indicated (asterisk) LINE-1 element as in Figure 1. **b)** HELP-seq browser track showing mouse chr15:31097720-31097931 (genomic build mm9) and no change in DNA methylation at indicated (asterisk) genomic locus. **c)** Bioinformatics pipeline scheme used to analyse HELP-seq repeat element data. **d)** Analysis of genome-wide HELP-seq DNA methylation difference reproducibility in biological replicate libraries at repeat classes in WT & *Lsh*<sup>-/-</sup> cell line pair. Compare the OR profile for compiled replicates 2 and 3 (shown here) and replicate 1 shown in Figure 1. Scale is calculated odds-ratio (OR; Additional file 1: Figure S2). OR>1 hypomethylation in *Lsh*<sup>-/-</sup> indicated by green arrow; OR<1 hypermethylation in *Lsh*<sup>-/-</sup> indicated by red arrow. **e)** Table of read counts and statistics for HELP-seq replicates 2 and 3 as shown above in S2d. **f)** Bisulfite sequencing pattern at mouse IAP LTR (left) and IAP *gag* gene (right) in heterozygous and homozygous Dnmt3b MEFs. Percentage methylation and cell types indicated. Black square = methylated; white square = unmethylated; red square = non-consensus CpG. See Additional file 1: Figure S6 for bisulfite primer locations. **g)** RRBS data mined for methylation levels at indicated repeat classes in *p53*<sup>-/-</sup> MEFs. **h)** RRBS data mined for methylation levels at indicated repeat classes in *p53*<sup>-/-</sup> | *Dnmt1*<sup>-/-</sup> MEFs.

**Figure S3.** Differential RNA-seq analysis of mouse IAP and LINE-1 in DNA methylation mutants. **a)** 10kb downstream IAP LTR probability density function plotted against fold change in indicated cell types. **b)** 10kb downstream non-IAP LTR fold-change plotted against

probability density function in indicated cell types. Note the lack of RNA-seq read changes between paired mutants and wildtype cells at regions 10kb downstream of annotated IAP LTRs (a) and non-IAP LTRs (b). Vertical lines indicate -5 and +5  $\log_2$ -fold changes. Scales: x-axis is  $\log_2$ -fold change RNA expression; y-axis is probability density function (P.D.F.). **c)** Overlap between misexpressed LTRs in DNA hypomethylated cell types. Numbers of unique LTRs misexpressed in each mutant colour-coded: Lsh (blue) and DN (green). Interestingly, there is greater overlap in misexpression between non-IAP LTRs than IAP LTRs in Lsh and DN datasets. **d)** Boxplot of spread of distance between unique LTRs which change in expression in Lsh and DN datasets and the nearest annotated gene. Lsh IAPs are generally further from genes than the genome average and DN IAPs. In fact, DN IAPs are nearer to genes than the genome average. In contrast, Lsh and DN non-IAP LTRs are closer to neighbouring genes than the genome average. **e)** To determine if upregulated IAP LTRs or non-IAP LTRs are evolutionarily conserved we compared our LTRs to the published locations of all mouse IAPLTR1\_Mm LTRs (n=1390) [77]. The generated LTR dataset was computationally divided into three distinct clades. Using BedTools we overlapped our LTRs with the published dataset and determined which clade our groups of LTRs belong to. Using chi-squared statistical tests, we found no significant difference between our LTR groups and the published LTR dataset ( $p > 0.1$  in all comparisons). X-axis is  $\log_2$ -fold change in repeat RNA expression; y-axis is probability density function (P.D.F.).

**Figure S4.** DNA hypomethylation and expression of LINE-1s are poorly correlated in *Lsh*<sup>-/-</sup> mutants. Plot of RNA-seq expression changes versus HELP-seq DNA methylation changes in *Lsh*<sup>-/-</sup> versus WT cells. LINE-1s plotted are indicated in colour (yellow=LINE-1s that were significantly differentially expressed as shown in Figure 4; grey = all LINE-1s including non-significant elements which were present in both RNA-seq and HELP-seq datasets). Significant (and non-significant) differences detected using EdgeR in RNA-seq reads sequenced between *Lsh*<sup>-/-</sup> and WT cells are plotted against significant changes (Fisher's t-test and Benjamini-Hochberg multiple testing) in HELP-seq reads. Vertical dashed lines indicate -5 and +5 RNA-seq  $\log_2$ -fold change thresholds and horizontal dashed lines indicate -1 and +1  $\log_2$ -fold change HELP-seq threshold. Note the pattern of expression: majority of LINE-1 are unchanged, a fraction are either upregulated or downregulated. However, many downregulated LINE-1s are hypomethylated, many upregulated LINE-1s are hypermethylated and *vice versa*.

**Figure S5.** Validation of repeat RNA-seq data by qRT-PCR on embryonic *Lsh*<sup>+/-</sup> and *Lsh*<sup>-/-</sup> E13.5 isolates and strand-specific major satellite expression analysis. **a)** qRT-PCR expression of IAP sequences in *Lsh*<sup>+/-</sup> and *Lsh*<sup>-/-</sup> E13.5 embryos showing major transcriptional derepression at IAP-*gag* and IAP*Ez-int*. **b)** Similar to **(a)** marked derepression of mouse major satellite transcripts. **c)** SINE derived sequences show low expression in mutant embryos (note scale). **d)** LINE-1 5'UTR and ORF1 transcripts show little derepression in mutant embryos. **e)** GAPDH expression loading control for RNA samples analysed showing similar levels of this constitutive transcript. -rt shows undetectable signal in the absence of

reverse transcriptase. WT samples= red; *Lsh*<sup>-/-</sup> samples = orange. **f)** Strand-specific qRTPCR showed no preference for sense or antisense transcription in the absence of Lsh. All experiments are in triplicate. Expression level units are arbitrary and are all normalised to GAPDH expression levels. Also shown is *Tex19.1* mis-expression in *Dnmt3b*<sup>-/-</sup> and *Dnmt1*<sup>-/-</sup> (DN) cells. **g)** Indicated repeat expression levels in *p53*<sup>-/-</sup> and *p53*<sup>-/-</sup> | *Dnmt1*<sup>-/-</sup> MEFs. grey=*p53*<sup>-/-</sup> MEFs (*p53*); red=*p53*<sup>-/-</sup> | *Dnmt1*<sup>-/-</sup> MEFs (DN). Experiments represent triplicate analysis. See Additional file 1: Figure S6 for qRTPCR primer locations. Expression level units are arbitrary (arbitrary expression units A.E.U.) and are all normalised to GAPDH expression levels. **h)** The TEM for *Dnmt3b*<sup>-/-</sup> cells does not detect VLPs.

**Figure S6.** Bisulfite, qRTPCR and ChIP primer maps on repeats. **a)** Bisulfite primers on major satellites, minor satellites and the IAP LTR are depicted. Black and white triangle pairs indicate primer pairs. Vertical blue lines indicate locations of CpG dinucleotides. Product sizes are indicated in base pairs. **b)** qRTPCR primers for expression analysis on IAP LTRs, major satellites, SINE B1, LINE-1 and *Gapdh* are depicted. Black and white triangle pairs indicate primer pairs. **c)** ChIP primers on major satellites, IAP LTRs, LINE-1 and beta-actin are depicted. Black and white triangle pairs indicate primer pairs.

**Figure S7.** Knockdown of Lsh does not induce hypomethylation in terminally differentiated tailtip fibroblasts nor embryonic stem cells. **a)** Lentiviral infection (#sh44 and #sh48) of WT tailtip fibroblasts reduces Lsh protein levels by 60-80% compared to non-mammalian target sequence (shNM). Extract dilutions were blotted and probed with Lsh and tubulin antibodies. **b)** Densitometry of western blots using ImageJ software. **c)** Lsh-depleted fibroblast genomic DNA retains normal methylation levels. Genomic DNA digested with *Maell* reveals normal methylation digestion profiles in sh44 and sh48 DNA compared to shNM DNA. *Lsh*<sup>-/-</sup> genomic DNA is a positive control for hypomethylation – see small digestion fragments (arrowheads). **d)** IAP is not upregulated in Lsh knockdown fibroblasts by qRT-PCR – note similar levels of IAP expression in Lsh knockdowns (sh44 & sh48) compared to shNM. **e)** Wildtype and mutant Lsh (ATPase mutant) do not rescue hypomethylation in *Lsh*<sup>-/-</sup> MEFs. *Lsh*<sup>-/-</sup> cells were transfected for 72 hours with GFP, GFP-Lsh or GFP-Lsh<sup>ATPase</sup> and genomic DNA isolations (including WT MEF DNA for comparison) were digested with *Maell* or *HpaII* - note presence of small DNA digestion fragments (arrowheads) in Lsh cells transfected with either Lsh or Lsh<sup>ATPase</sup>. **f)** Lsh-depleted ES cell genomic DNA retains normal methylation levels. Genomic DNA was digested with *Maell*, revealing normal methylation digestion profiles in sh44 and sh48 DNA compared to shNM DNA. **g)** Clonal ES cells from anti-Lsh lentiviral infections are depleted for Lsh protein. Western blotting shows marked reduction in Lsh protein comparing five control ES clones (shNM) against six Lsh-depleted ES clones (sh44). Blots were probed as in (a). **h)** Lsh-depleted ES clone genomic DNA retains normal methylation levels. Genomic DNA was digested with *HpaII* or *MaeII* revealing normal methylation digestion profiles in sh44 genomic DNA compared to shNM genomic DNA

# Supp S1

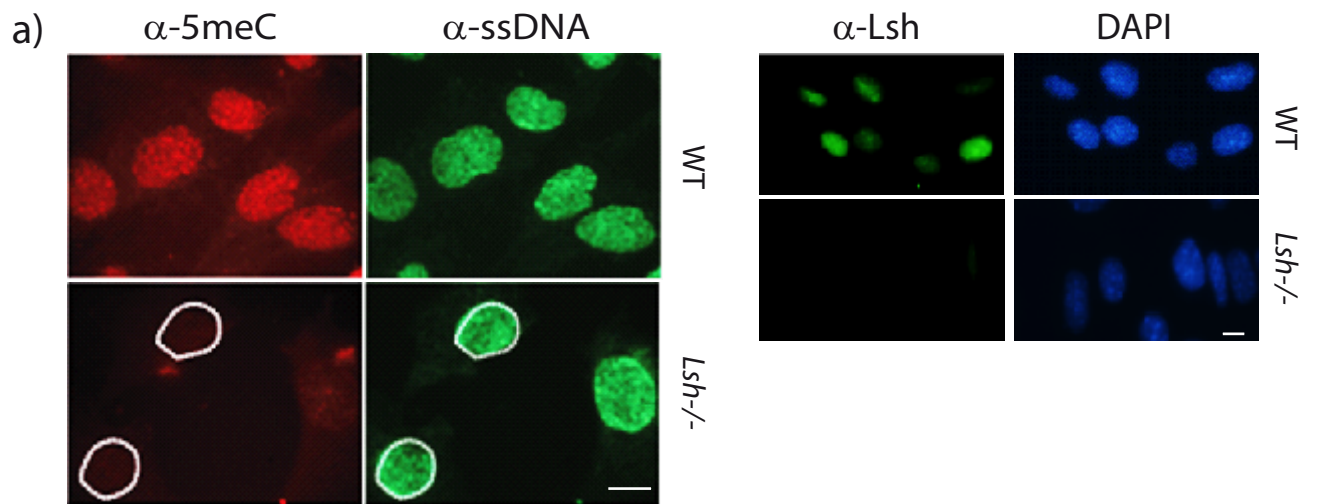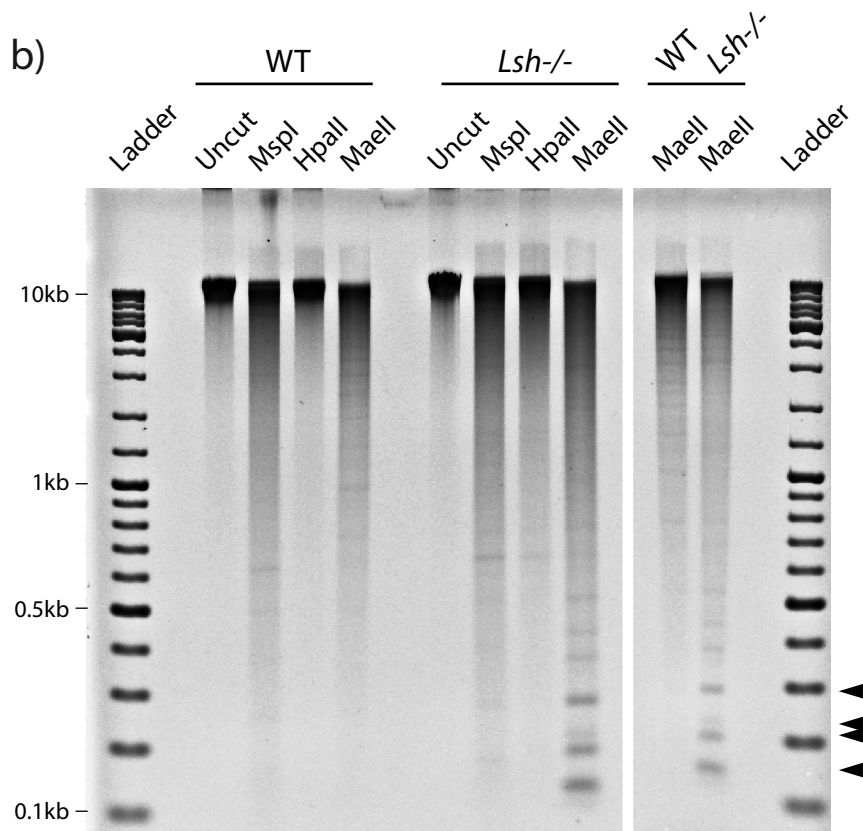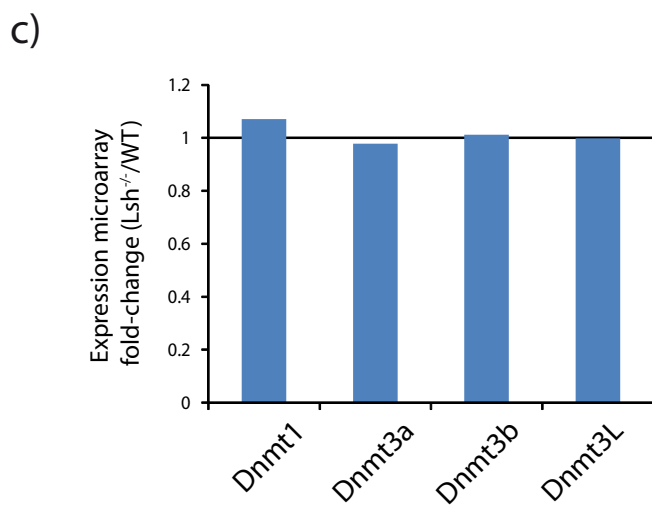

# Supp S2

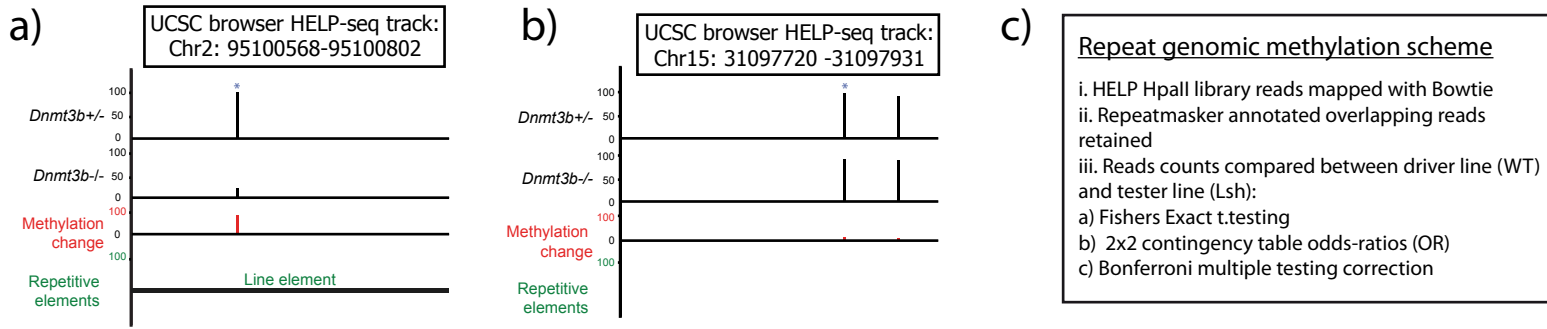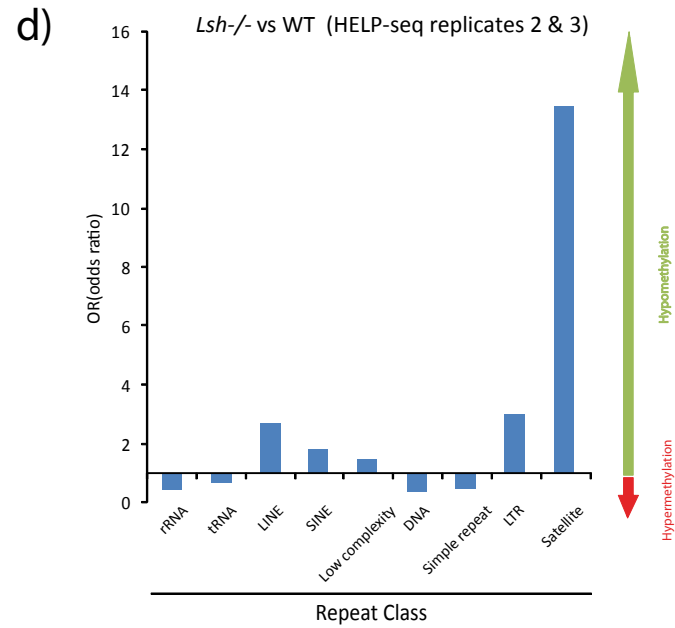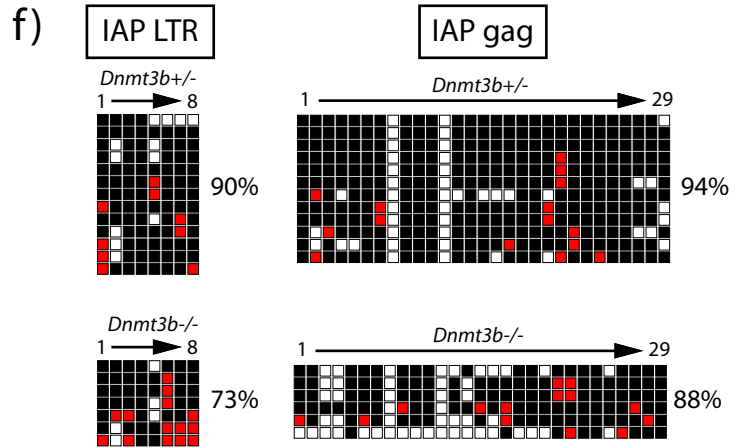

e) Repeats 2 & 3

| Class                                | rRNA     | tRNA     | LINE     | SINE     | DNA      | Low complexity | Simple repeat | LTR      | Satellite |
|--------------------------------------|----------|----------|----------|----------|----------|----------------|---------------|----------|-----------|
| <i>Lsh</i> <sup>-/-</sup>            | 88030    | 4285     | 3213238  | 903925   | 74772    | 275181         | 160680        | 1646044  | 148105    |
| <i>Lsh</i> <sup>-/-</sup> proportion | 0.006078 | 0.000296 | 0.221863 | 0.062413 | 0.005163 | 0.019000335    | 0.011094421   | 0.113654 | 0.010226  |
| WT                                   | 141381   | 4674     | 885197   | 365806   | 38262    | 531685         | 250854        | 408561   | 8211      |
| WT proportion                        | 0.013112 | 0.000433 | 0.082095 | 0.033926 | 0.003548 | 0.049309591    | 0.02326473    | 0.037891 | 0.000762  |
| OR                                   | 0.463559 | 0.68254  | 2.702519 | 1.839702 | 1.454913 | 0.385327377    | 0.47687727    | 2.99951  | 13.42887  |

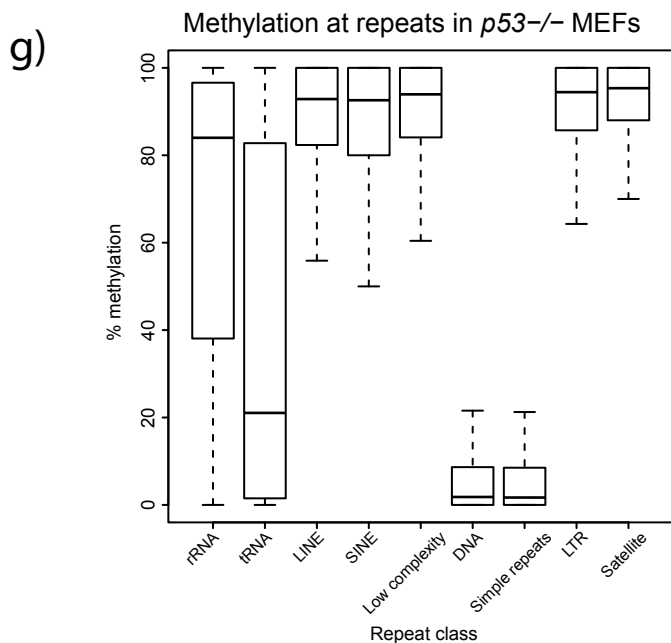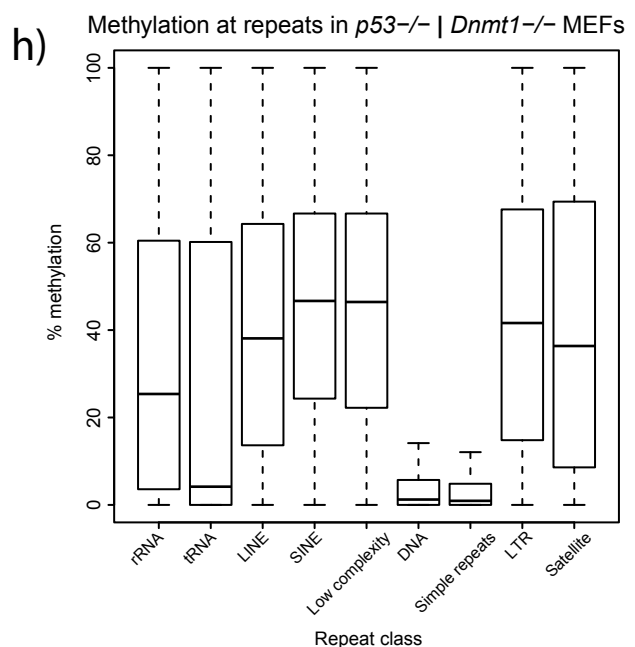

# Supp S3

10kb downstream

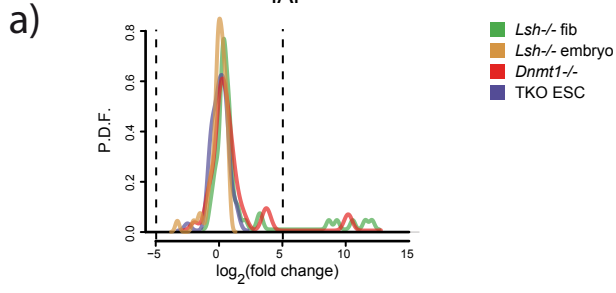

10kb downstream

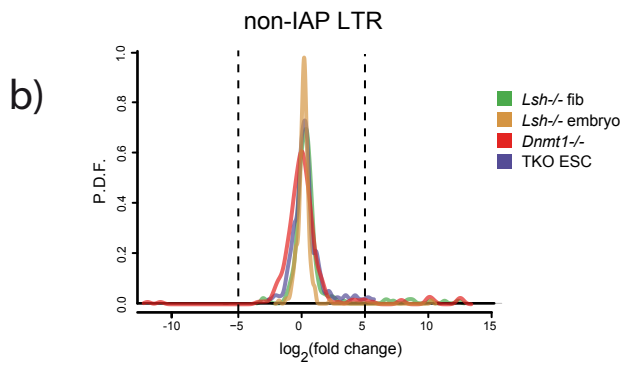

d)

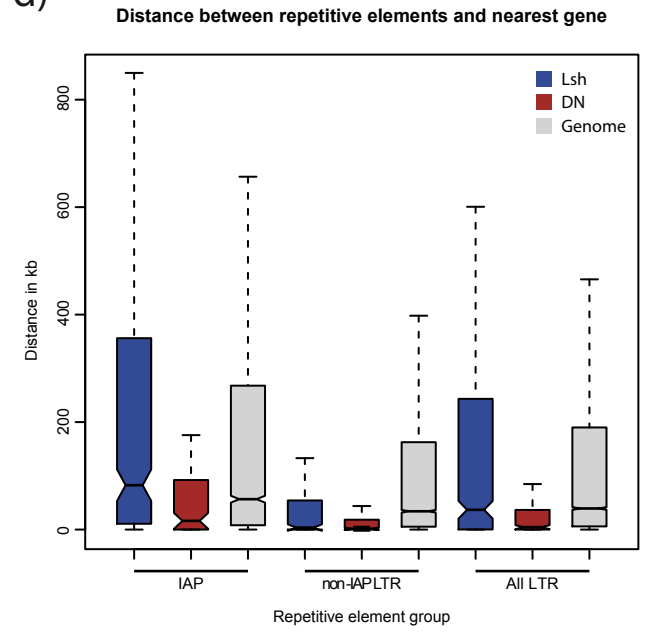

c)

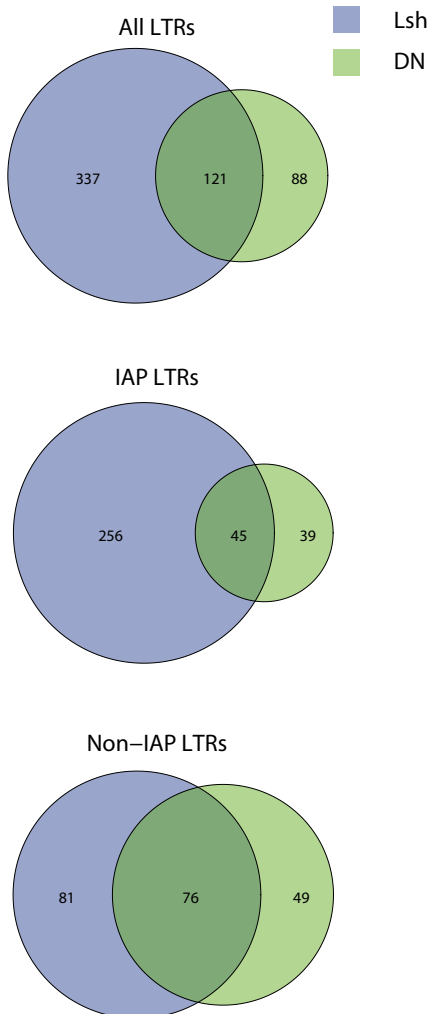

e)

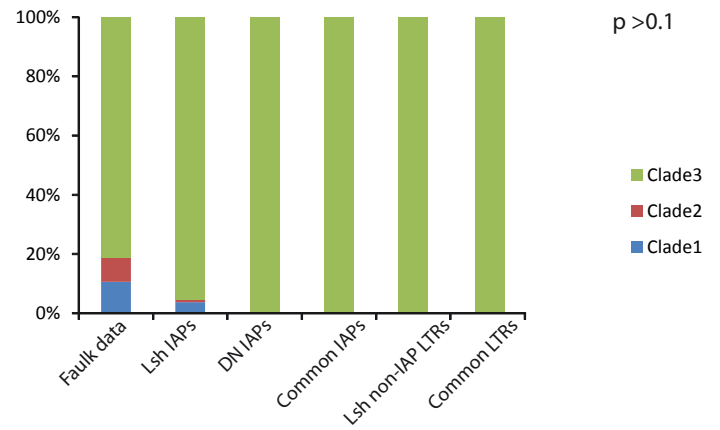

# Supp S4

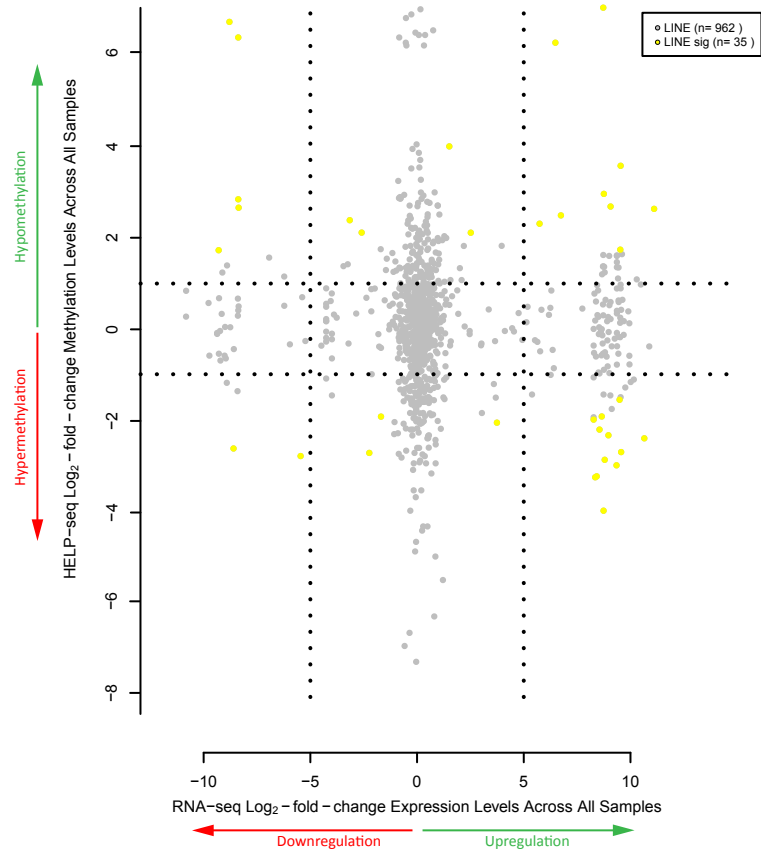

# Supp S5

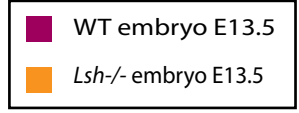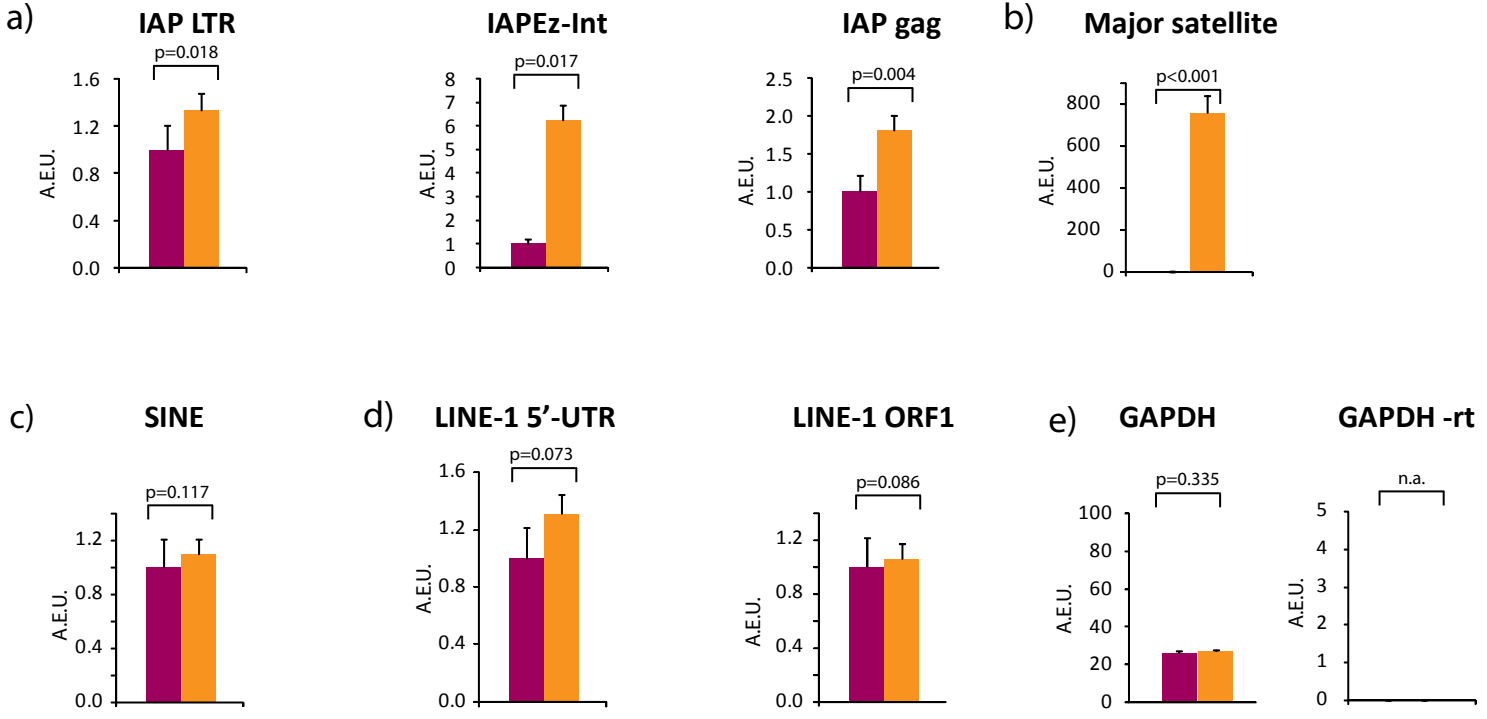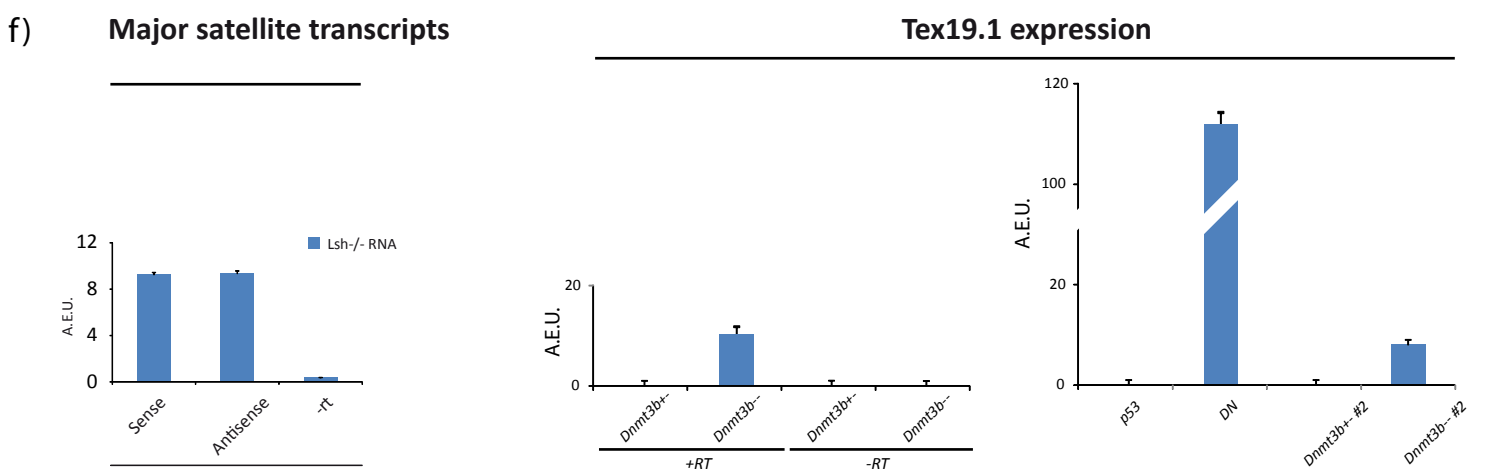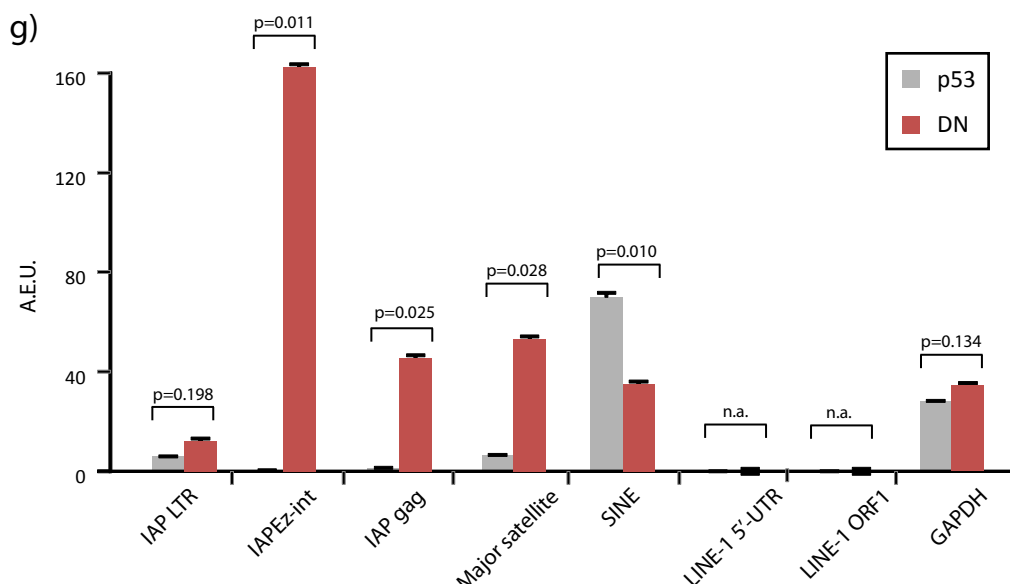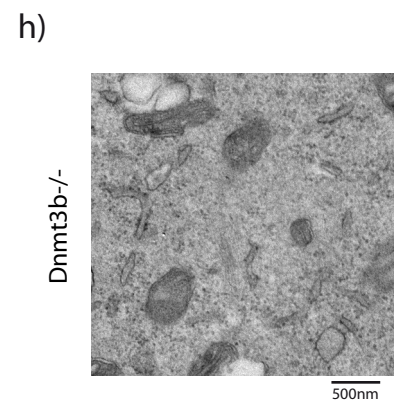



# Supp S6

a)

## Bisulfite primer regions

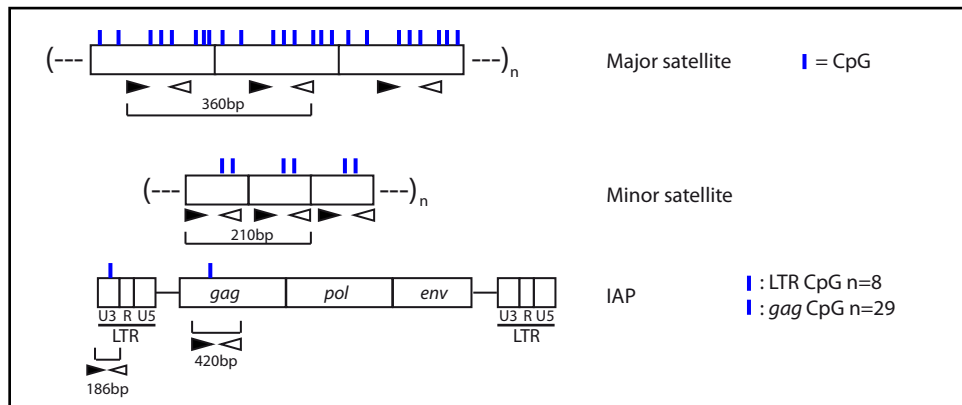

b)

## qRTPCR primer regions

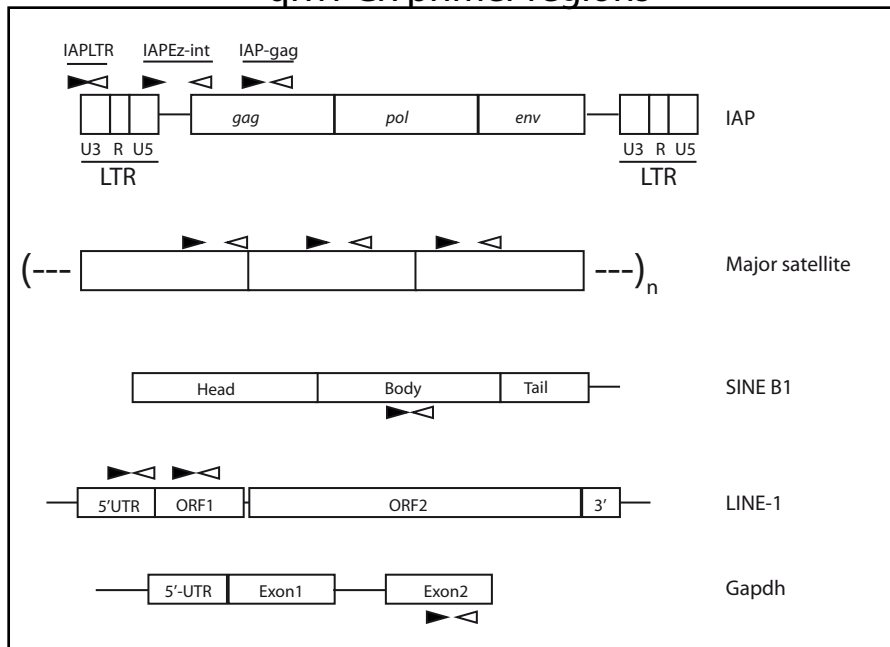

c)

## ChIP primer regions

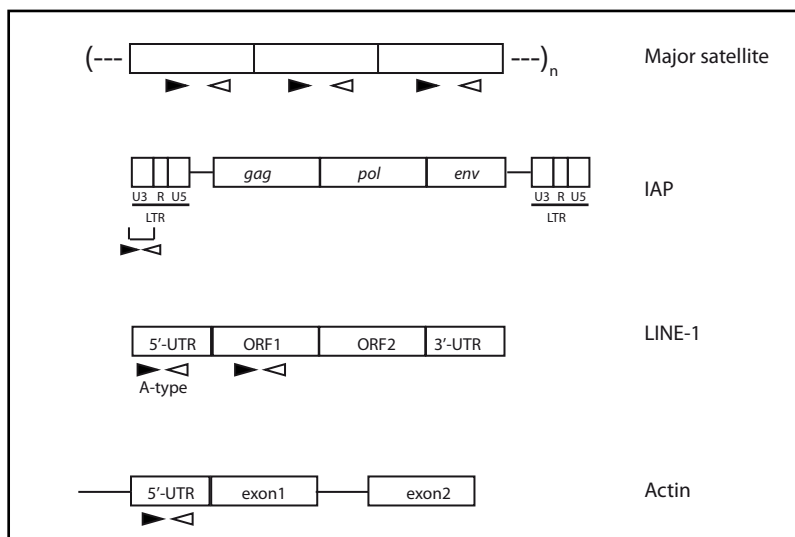

# Supp S7

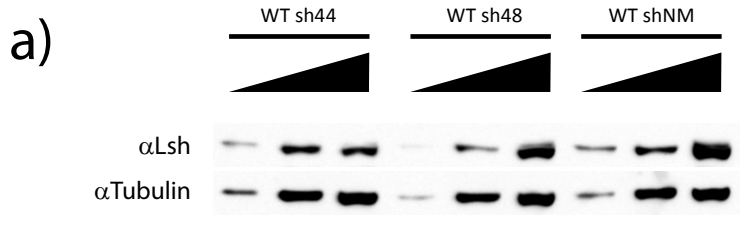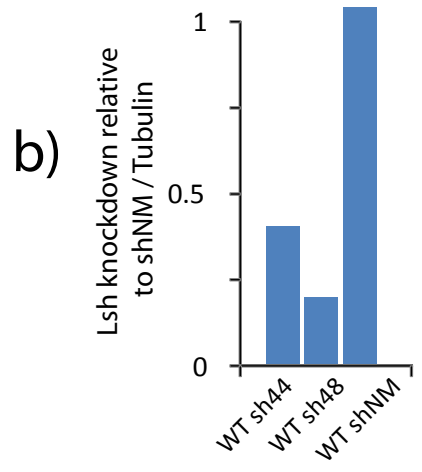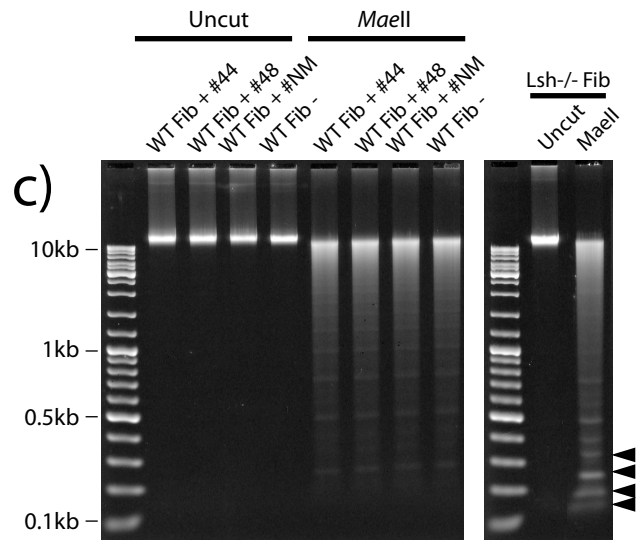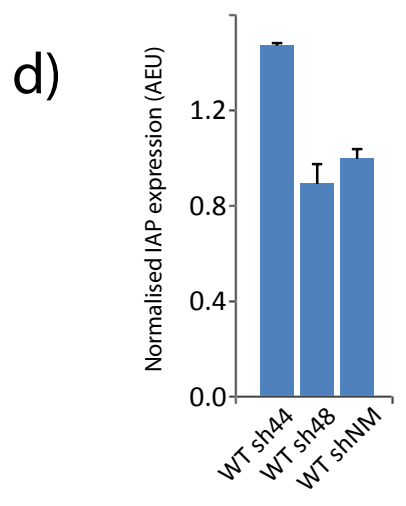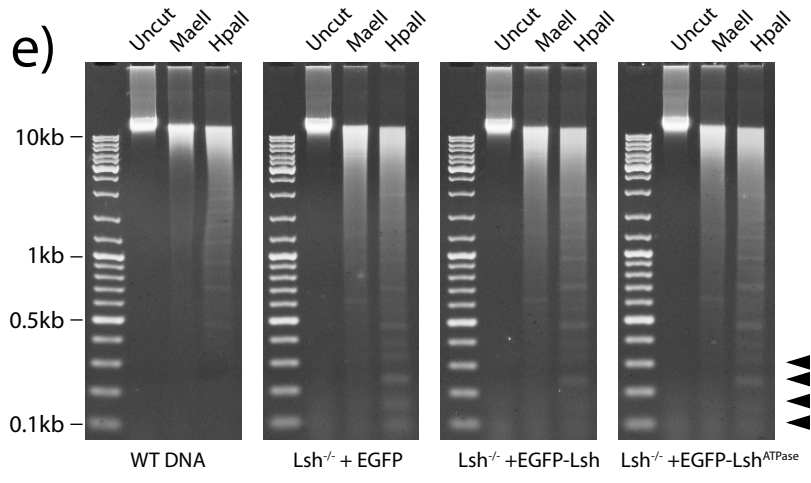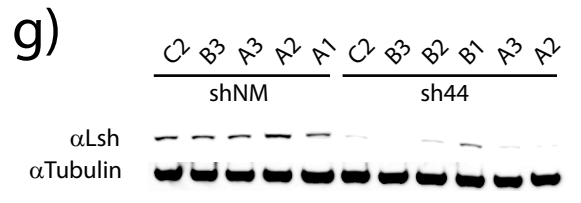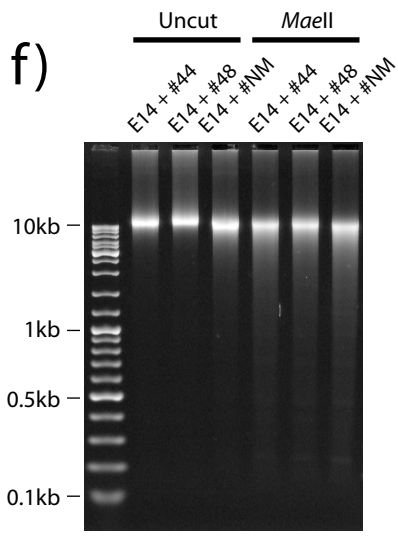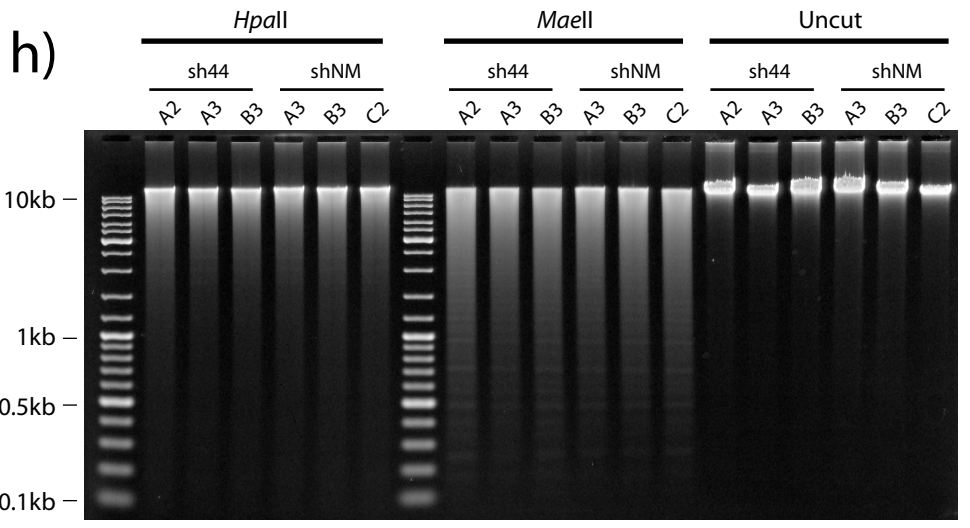

Supp. S1 List of primer oligonucleotides used in this study

| Bisulfite sequencing         |                                                                     |
|------------------------------|---------------------------------------------------------------------|
| Name                         | Forward<br>Reverse                                                  |
| CHR2:95100568-95100802 outer | TGTGTTTTGTTTGTAG<br>AAACAACACCCCTTTATAAAC                           |
| CHR2:95100568-95100802 inner | TTGTTTTAGAAAGTTGTAGG<br>AACCTAAACAACCTCTAAAAC                       |
| CHR15:31097720-3109793 outer | ATGAATTTAATTAGTGGTTG<br>CTACTACAAA CCAAAAAACC                       |
| CHR15:31097720-3109793 inner | GTGGTTGGTGTTTTTAAG<br>TCAAAAAA C TACTACAAAACC                       |
| Major satellite              | GGAAATATGGTAAGAAAAATTGAAAAATTATGG<br>CCATATCCAAATCCTTCAATATACATTTTC |
| Minor satellite              | TAGAATATATTAGATGAGTGAGTTATATTG<br>ATTATAACTCATTAAATATACACTATTCTAC   |
| IAP_gag outer                | TTTTGAGGAAATAGATTGGGAG<br>TCAACAACRTTAATACCATAC                     |
| IAP_gag inner                | AGATTGGGAGGAAGAAGTAG<br>CAACRAACCTATCTAACTAC                        |
| IAP_ltr outer                | GGGTGTTATTTGTTTTTATTTAAAAG<br>AAACRCATCACTCCCTAAATTAECTAC           |
| IAP_ltr inner                | GTTTTTATTTAAAAGAAAAAGGGG<br>ATTAAC TACAACCCATAAAC                   |
| qRTPCR                       |                                                                     |
| Name                         | Forward<br>Reverse                                                  |
| IAP LTR                      | GATGGTGCTGACATCCTGTG<br>CTGACGTTACGGGAAAAAC                         |
| IAP-EzInt                    | TCCCAGCTGAAAAGTTCTG<br>AAGAGAAAA TCCGGGACGAG                        |
| IAP gag                      | TCCACGCTCCGGTAGAATAC<br>AGGCGTTAGTGCATACCAG                         |
| Major satellite              | AAATACACACTTTAGGACG<br>TCAAGTGGATGTTTCTCATT                         |
| Sine                         | CGCCTTTAA TTGCAGCACTC<br>TG TAGAGCCCTAGCTGTCCCTG                    |
| L1-5'UTR                     | AATGTCTCCCAGGTCTGC<br>CCTTTCGCCATCTGGTAATC                          |
| L1 ORF1                      | ATCCAGGAAATCCAGGACAC<br>TTTGCTGGACCTTTGAGTTG                        |
| GAPDH                        | GGTCTCAGTGTAGCCCAAG<br>ACCCAGAA GACTGTGGATGG                        |
| Strand-specific qRTPCR       |                                                                     |
| Major satellite              | AAATACACACTTTAGGACG<br>TCAAGTGGATGTTTCTCATT                         |
